# Supplementary material for: Low-Hydrophilic HKUST−1/Polymer Extrudates for the PSA Separation of CO2/CH4
Source: MDPI journal article supplement (doi:10.3390/molecules29092069), 2024-04-30
Supplement: s1 [file s1]

# Low-Hydrophilic HKUST-1/Polymer Extrudates for the PSA Separation of CO<sub>2</sub>/CH<sub>4</sub>

Muhamad Tahriri Rozaini <sup>1,2</sup>, Denys I. Grekov <sup>2</sup>, Mohamad Azmi Bustam <sup>1,\*</sup> and Pascaline Pré <sup>2,\*</sup>

<sup>1</sup> Centre of Research in Ionic Liquids, CORIL, Chemical Engineering Department, Universiti Teknologi Petronas, Bandar Seri Iskandar 32610 Perak, Malaysia;  
muhamad\_21000026@utp.edu.my or muhamad-tahriri.bin-rozaini@imt-atlantique.fr

<sup>2</sup> GENie des Procédés Environnement-Agroalimentaire (GEPEA) UMR-CNRS 6144,  
Department of Energy Systems and Environment, IMT Atlantique, 44300 Nantes, France;  
denys.grekov@imt-atlantique.fr

\* Correspondence: azmibustam@utp.edu.my (M.A.B.); pascaline.pre@imt-atlantique.fr (P.P.)

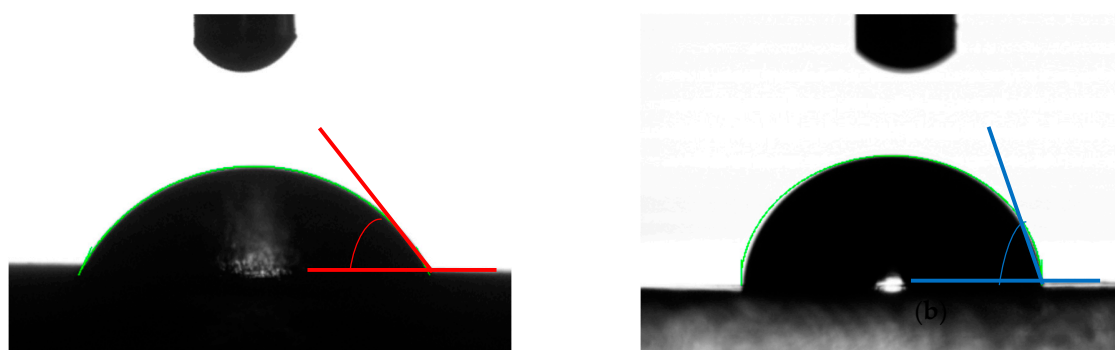

**Figure S1:** Image of water drop onto the surface of PLA (left) and TPU (right).

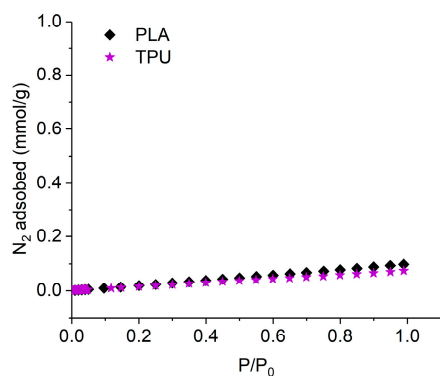

**Figure S2.** N<sub>2</sub> adsorption isotherm plot for TPU and PLA. Data for PLA was taken from previous study [1]

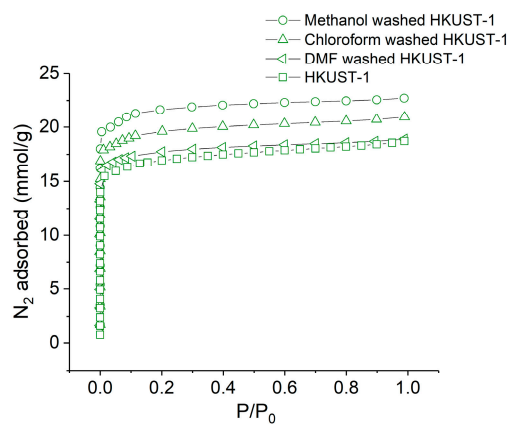

**Figure S3.** N<sub>2</sub> adsorption isotherms on HKUST-1 and solvent-washed HKUST-1.

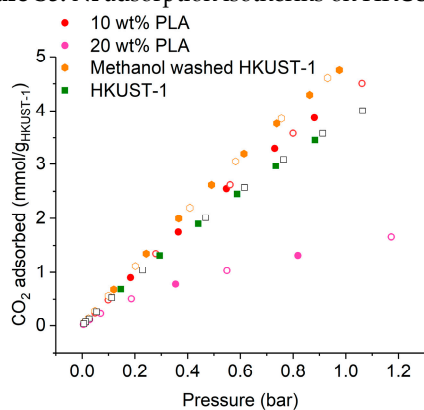

**Figure S4:** Normalize CO<sub>2</sub> adsorption isotherm plot for pristine HKUST-1, methanol washed HKUST-1 and HKUST-1/PLA composites with different binder fraction.

**Table S1:** Fitting Parameters of the Dual-site Langmuir Isotherm Model for the CO<sub>2</sub> and CH<sub>4</sub> pure isotherms on HKUST-1, HKUST-1/PLA and HKUST-1/TPU.

|                    |                                      | HKUST-1         |       |       |                 |       |       | HKUST-1/PLA     |       |       |                 |       |       | HKUST-1/TPU     |       |       |                 |       |       |
|--------------------|--------------------------------------|-----------------|-------|-------|-----------------|-------|-------|-----------------|-------|-------|-----------------|-------|-------|-----------------|-------|-------|-----------------|-------|-------|
|                    |                                      | CO <sub>2</sub> |       |       | CH <sub>4</sub> |       |       | CO <sub>2</sub> |       |       | CH <sub>4</sub> |       |       | CO <sub>2</sub> |       |       | CH <sub>4</sub> |       |       |
| Isotherm model     | Fitted parameters                    | 273 K           | 298 K | 323 K | 273 K           | 298 K | 323 K | 273 K           | 298 K | 323 K | 273 K           | 298 K | 323 K | 273 K           | 298 K | 323 K | 273 K           | 298 K | 323 K |
| Dual-Site Langmuir | R <sup>2</sup>                       | 0.998           | 0.999 | 0.999 | 0.998           | 0.997 | 0.998 | 0.998           | 0.998 | 0.999 | 0.999           | 0.999 | 0.998 | 0.998           | 0.997 | 0.999 | 0.999           | 0.996 | 0.996 |
|                    | q <sub>s1</sub> (mol/kg)             | 12.23           |       |       | 9.81            |       |       | 14.61           |       |       | 16.07           |       |       | 14.50           |       |       | 15.30           |       |       |
|                    | q <sub>s2</sub> (mol/kg)             | 2.09            |       |       | 2.09            |       |       | 2.09            |       |       | 2.09            |       |       | 2.09            |       |       | 2.09            |       |       |
|                    | k <sub>a1</sub> (bar <sup>-1</sup> ) | 116.76          |       |       | 1.83            |       |       | 48.14           |       |       | 0.67            |       |       | 44.23           |       |       | 1.10            |       |       |
|                    | k <sub>a2</sub> (K <sup>-1</sup> )   | 3066.95         |       |       | 1762.24         |       |       | 2685.58         |       |       | 1418.62         |       |       | 2614.42         |       |       | 1724.25         |       |       |
|                    | k <sub>b1</sub> (bar <sup>-1</sup> ) | 60.29           |       |       | 60.28           |       |       | 60.29           |       |       | 60.28           |       |       | 60.29           |       |       | 60.28           |       |       |
|                    | k <sub>b2</sub> (K <sup>-1</sup> )   | 1404.2          |       |       | 36328.4         |       |       | 14404.1         |       |       | 36328.42        |       |       | 14404.5         |       |       | 36328.42        |       |       |

**Table S2.** BET Surface area, pore volume of HKUST-1 and the respective solvent-washed HKUST-1.

| Sample                    | S <sub>BET</sub> (m <sup>2</sup> /g) | Micropore volume (cm <sup>3</sup> /g) | Total pore volume (cm <sup>3</sup> /g) |
|---------------------------|--------------------------------------|---------------------------------------|----------------------------------------|
| Pristine HKUST-1          | 1500                                 | 0.46                                  | 0.65                                   |
| DMF washed HKUST-1        | 1616                                 | 0.46                                  | 0.65                                   |
| Chloroform washed HKUST-1 | 1762                                 | 0.51                                  | 0.72                                   |
| Methanol washed HKUST-1   | 1956                                 | 0.60                                  | 0.79                                   |

## References

1. Rozaini, Muhamad Tahriri, Denys I. Grekov, Mohamad Azmi Bustam, and Pascaline Pré, "Shaping of HKUST-1 via Extrusion for the Separation of CO<sub>2</sub>/CH<sub>4</sub> in Biogas," *Separations* , vol. 10, no. 9, p. 487, 2023.
